# Supplementary material
Source: PubMed Central journal article supplement (PMC2043017)
Supplement: pbio.0050246.sg001.pdf [file pbio.0050246.sg001.pdf]

### LacI-GFP

[illegible][illegible]

| DT40   | TAC | CAG | CAG | AAG | TCT | CCT | GGC | AGT | GCC | CCT | GTC | ACT | GTG | ATC | TAT | GAC | AAC | GAC | AAG | AGA | CCC | TCG |
|--------|-----|-----|-----|-----|-----|-----|-----|-----|-----|-----|-----|-----|-----|-----|-----|-----|-----|-----|-----|-----|-----|-----|
| GFP-1  |     |     |     |     |     |     |     |     |     |     |     |     |     |     |     |     |     |     |     |     |     |     |
| GFP-2  |     |     |     |     |     |     |     |     |     |     |     |     |     |     |     |     |     |     |     |     |     |     |
| GFP-3  |     |     |     |     | G-A |     |     |     |     |     |     | C-  |     |     | T-  |     | A-  |     |     |     |     |     |
| GFP-4  |     |     |     |     | G-A |     |     |     |     |     |     | C-  |     |     | T-  |     | A-  |     |     |     |     |     |
| GFP-5  |     |     |     |     | G-A |     |     |     |     |     |     | C-  |     |     | T-  |     | A-  |     |     |     |     |     |
| GFP-6  |     |     |     |     | A   |     |     |     |     |     |     | C-  |     |     | T-  |     | A-  |     |     |     |     |     |
| GFP-7  |     |     |     |     | G-A |     |     |     |     |     |     | G-C |     |     | T-  |     | A-  |     |     |     |     |     |
| GFP-8  |     |     |     |     | G-A |     |     |     |     |     |     | C-  |     |     | T-  |     | A-  |     |     |     |     |     |
| GFP-9  |     |     |     |     | G-A |     |     |     |     |     |     | C-  |     |     | T-  |     | A-  |     |     |     |     |     |
| GFP-10 |     |     |     |     | G-A |     |     |     |     |     |     | C-  |     |     | T-  |     | A-  |     |     |     |     |     |
| GFP-11 |     |     |     |     | G-A |     |     |     |     |     |     |     |     |     | AG- |     | A-  |     |     |     |     |     |
| GFP-12 |     |     |     |     | G-A |     |     |     |     |     |     |     |     |     | T-  |     | A-  |     |     |     |     |     |
| GFP-13 |     |     |     |     | G-A |     | A-  |     |     | T-  |     | C-  |     |     | T-  |     | A-  |     |     |     |     |     |
| GFP-14 |     |     |     |     | G-A |     |     |     |     |     |     | C-  |     |     | T-  |     | A-  |     |     | C-  |     |     |
| GFP-15 |     |     |     |     | G-A |     |     |     |     |     |     | C-  |     |     | T-  |     | A-  |     |     |     |     |     |
| GFP-16 |     |     |     |     | G-A |     |     |     |     |     |     | C-  |     |     | T-  |     | A-  |     |     |     |     |     |
| GFP-17 |     |     |     |     | G-A |     |     |     |     |     |     | C-  |     |     | T-  |     | A-  |     |     |     |     |     |
| GFP-18 |     |     |     |     | G-A |     |     |     |     |     |     | C-  |     |     | T-  |     | A-  |     |     |     |     |     |
| GFP-19 |     |     |     |     | G-A |     |     |     |     |     |     |     |     |     | T-  |     | A-  |     |     |     |     |     |



| DT40   | TCT | CCC | TCT | CCA | GGT | TCC | CTG | GTG | CAG | GCAGGCG | CTG | ACT | CAG | CCG | GCC | TCG | GTG | TCA | GCA | AAC | CTA |
|--------|-----|-----|-----|-----|-----|-----|-----|-----|-----|---------|-----|-----|-----|-----|-----|-----|-----|-----|-----|-----|-----|
| HP1-1  | --- | --- | --- | --- | --- | --- | --- | --- | --- | ---     | --- | --- | --- | --- | --- | --- | --- | --- | --- | --- | --- |
| HP1-2  | --- | --- | --- | --- | --- | --- | --- | --- | --- | ---     | --- | --- | --- | --- | --- | --- | --- | --- | --- | --- | --- |
| HP1-3  | --- | --- | --- | --- | --- | --- | --- | --- | --- | ---     | --- | --- | --- | --- | --- | --- | --- | --- | --- | --- | --- |
| HP1-4  | --- | --- | --- | --- | --- | --- | --- | --- | --- | ---     | --- | --- | --- | --- | --- | --- | --- | --- | --- | --- | --- |
| HP1-5  | --- | --- | --- | --- | --- | --- | --- | --- | --- | ---     | --- | --- | --- | --- | --- | --- | --- | --- | --- | --- | --- |
| HP1-6  | --- | --- | --- | --- | --- | --- | --- | --- | --- | ---     | --- | --- | --- | --- | --- | --- | --- | --- | --- | --- | --- |
| HP1-7  | --- | --- | --- | --- | --- | --- | --- | --- | --- | ---     | --- | --- | --- | --- | --- | --- | --- | --- | --- | --- | --- |
| HP1-8  | --- | --- | --- | --- | --- | --- | --- | --- | --- | ---     | --- | --- | --- | --- | --- | --- | --- | --- | --- | --- | --- |
| HP1-9  | --- | --- | --- | --- | --- | --- | --- | --- | --- | ---     | --- | --- | --- | --- | --- | --- | --- | --- | --- | --- | --- |
| HP1-10 | --- | --- | --- | --- | --- | --- | --- | --- | --- | ---     | --- | --- | --- | --- | --- | --- | --- | --- | --- | --- | --- |
| HP1-11 | --- | --- | --- | --- | --- | --- | --- | --- | --- | ---     | --- | --- | --- | --- | --- | --- | --- | --- | --- | --- | --- |
| HP1-12 | --- | --- | --- | --- | --- | --- | --- | --- | --- | ---     | --- | --- | --- | --- | --- | --- | --- | --- | --- | --- | --- |
| HP1-13 | --- | --- | --- | --- | --- | --- | --- | --- | --- | ---     | --- | --- | --- | --- | --- | --- | --- | --- | --- | --- | --- |
| HP1-14 | --- | --- | --- | --- | --- | --- | --- | --- | --- | ---     | --- | --- | --- | --- | --- | --- | --- | --- | --- | --- | --- |

  

| DT40   | GGA | GGA | ACC | GTC | AAG | ATC | ACC | TGC | TCC | GGG | GGT | GGC | AGC | TAT | GCT | GGA | AGT | TAC | TAT | TAT | GGC | TGG |
|--------|-----|-----|-----|-----|-----|-----|-----|-----|-----|-----|-----|-----|-----|-----|-----|-----|-----|-----|-----|-----|-----|-----|
| HP1-1  | --- | --- | --- | --- | --- | --- | --- | --- | --- | --- | --- | --- | --- | --- | --- | --- | --- | --- | --- | --- | --- | --- |
| HP1-2  | --- | --- | --- | --- | --- | --- | --- | --- | --- | --- | --- | --- | --- | --- | --- | --- | --- | --- | --- | --- | --- | --- |
| HP1-3  | --- | --- | --- | --- | --- | --- | --- | --- | --- | --- | --- | --- | --- | --- | --- | --- | --- | --- | --- | --- | --- | --- |
| HP1-4  | --- | --- | --- | --- | --- | --- | --- | --- | --- | --- | --- | --- | --- | --- | --- | --- | --- | --- | --- | --- | --- | --- |
| HP1-5  | --- | --- | --- | --- | --- | --- | --- | --- | --- | --- | --- | --- | --- | --- | --- | --- | --- | --- | --- | --- | --- | --- |
| HP1-6  | --- | --- | --- | --- | --- | --- | --- | --- | --- | --- | --- | --- | --- | --- | --- | --- | --- | --- | --- | --- | --- | --- |
| HP1-7  | --- | --- | --- | --- | --- | --- | --- | --- | --- | --- | --- | --- | --- | --- | --- | --- | --- | --- | --- | --- | --- | --- |
| HP1-8  | --- | --- | --- | --- | --- | --- | --- | --- | --- | --- | --- | --- | --- | --- | --- | --- | --- | --- | --- | --- | --- | --- |
| HP1-9  | --- | --- | --- | --- | --- | --- | --- | --- | --- | --- | --- | --- | --- | --- | --- | --- | --- | --- | --- | --- | --- | --- |
| HP1-10 | --- | --- | --- | --- | --- | --- | --- | --- | --- | --- | --- | --- | --- | --- | --- | --- | --- | --- | --- | --- | --- | --- |
| HP1-11 | --- | --- | --- | --- | --- | --- | --- | --- | --- | --- | --- | --- | --- | --- | --- | --- | --- | --- | --- | --- | --- | --- |
| HP1-12 | --- | --- | --- | --- | --- | --- | --- | --- | --- | --- | --- | --- | --- | --- | --- | --- | --- | --- | --- | --- | --- | --- |
| HP1-13 | --- | --- | --- | --- | --- | --- | --- | --- | --- | --- | --- | --- | --- | --- | --- | --- | --- | --- | --- | --- | --- | --- |
| HP1-14 | --- | --- | --- | --- | --- | --- | --- | --- | --- | --- | --- | --- | --- | --- | --- | --- | --- | --- | --- | --- | --- | --- |

  

| DT40  | TAC | CAG | CAG | AAG | TCT | CCT | GGC | AGT | GCC | CCT | GTC | ACT | GTG | ATC | TAT | GAC | AAC | GAC | AAG | AGA | CCC | TCG |
|-------|-----|-----|-----|-----|-----|-----|-----|-----|-----|-----|-----|-----|-----|-----|-----|-----|-----|-----|-----|-----|-----|-----|
| HP1-1 | --- | --- | --- | --- | --- | --- | --- | --- | --- | --- | --- | --- | --- | --- | --- | --- | --- | --- | --- | --- | --- | --- |
| HP1-2 | --- | --- | --- | --- | --- |     |     |     |     |     |     |     |     |     |     |     |     |     |     |     |     |     |

|        |     |     |     |     |     |     |     |     |     |     |     |     |     |     |     |     |     |     |     |     |     |     |
|--------|-----|-----|-----|-----|-----|-----|-----|-----|-----|-----|-----|-----|-----|-----|-----|-----|-----|-----|-----|-----|-----|-----|
| DT40   | CGA | GCC | GAT | GAC | GAG | GCT | GTC | TAT | TTC | TGT | GGG | AGT | GCA | GAC | AAC | AGT | GGT | GCT | GCA | TTT | GGG | GCC |
| HP1-1  | --- | --- | --- | --- | --- | --- | --- | --- | --- | --- | --- | --- | --- | --- | --- | --- | --- | --- | --- | --- | --- | --- |
| HP1-2  | --- | --- | --- | --- | --- | --- | --- | --- | --- | --- | --- | --- | --- | --- | --- | --- | --- | --- | --- | --- | --- | --- |
| HP1-3  | --- | --- | --- | --- | --- | --- | --- | --- | --- | --- | --- | --- | --- | --- | --- | --- | --- | --- | --- | --- | --- | --- |
| HP1-4  | --- | --- | --- | --- | --- | --- | --- | --- | --- | --- | --- | --- | --- | --- | --- | --- | --- | --- | --- | --- | --- | --- |
| HP1-5  | --- | --- | --- | --- | --- | --- | --- | --- | --- | --- | --- | --- | --- | --- | --- | --- | --- | --- | --- | --- | --- | --- |
| HP1-6  | --- | --- | --- | --- | --- | --- | --- | --- | --- | --- | --- | C   | --- | --- | --- | --- | --- | --- | --- | --- | --- | --- |
| HP1-7  | --- | --- | --- | --- | --- | --- | --- | --- | --- | --- | --- | --- | --- | --- | --- | --- | --- | --- | --- | --- | --- | --- |
| HP1-8  | --- | --- | --- | --- | --- | --- | --- | --- | --- | --- | --- | --- | --- | --- | --- | --- | --- | --- | --- | --- | --- | --- |
| HP1-9  | --- | --- | --- | --- | --- | --- | --- | --- | --- | --- | --- | --- | --- | --- | --- | --- | --- | --- | --- | --- | --- | --- |
| HP1-10 | --- | --- | --- | --- | --- | --- | --- | --- | --- | --- | --- | --- | --- | --- | --- | --- | --- | --- | --- | --- | --- | --- |
| HP1-11 | --- | --- | --- | --- | --- | --- | --- | --- | --- | --- | --- | --- | --- | --- | --- | --- | --- | --- | --- | --- | --- | --- |
| HP1-12 | --- | --- | --- | --- | --- | --- | --- | --- | --- | --- | --- | --- | --- | --- | --- | --- | --- | --- | --- | --- | --- | --- |
| HP1-13 | --- | --- | --- | --- | --- | --- | --- | --- | --- | --- | --- | --- | --- | --- | --- | --- | --- | --- | --- | --- | --- | --- |
| HP1-14 | --- | --- | --- | --- | --- | --- | --- | --- | --- | --- | --- | --- | --- | --- | --- | --- | --- | --- | --- | --- | --- | --- |

  

|        |     |     |     |     |     |     |     |     |     |     |     |     |     |     |     |     |
|--------|-----|-----|-----|-----|-----|-----|-----|-----|-----|-----|-----|-----|-----|-----|-----|-----|
| DT40   | GGG | ACA | ACC | CTG | ACC | GTC | CTA | GGT | GAG | TCG | CTG | ACC | TCG | TCT | CGG | TCT |
| HP1-1  | --- | --- | --- | --- | --- | --- | --- | --- | --- | --- | A   | --- | --- | --- | --- | --- |
| HP1-2  | --- | --- | --- | --- | --- | --- | --- | --- | --- | --- | G   | --- | --- | --- | --- | --- |
| HP1-3  | --- | --- | --- | --- | --- | --- | --- | --- | --- | --- | --- | --- | --- | --- | --- | --- |
| HP1-4  | --- | --- | --- | --- | --- | --- | --- | --- | --- | --- | --- | --- | --- | --- | --- | --- |
| HP1-5  | --- | --- | --- | --- | --- | --- | --- | --- | --- | --- | --- | --- | --- | A   | --- | --- |
| HP1-6  | --- | --- | --- | --- | --- | --- | --- | --- | --- | --- | --- | --- | --- | --- | --- | --- |
| HP1-7  | --- | --- | --- | --- | --- | --- | --- | --- | --- | --- | --- | --- | --- | --- | --- | --- |
| HP1-8  | --- | --- | --- | --- | --- | --- | --- | --- | --- | --- | --- | --- | --- | --- | --- | --- |
| HP1-9  | --- | --- | --- | --- | --- | --- | --- | --- | --- | --- | --- | --- | --- | --- | --- | --- |
| HP1-10 | --- | --- | --- | --- | --- | --- | --- | --- | --- | --- | Δ   | T   | --- | --- | --- | --- |
| HP1-11 | --- | --- | --- | --- | --- | --- | --- | --- | --- | --- | --- | --- | --- | --- | --- | --- |
| HP1-12 | --- | --- | C   | --- | --- | --- | --- | --- | --- | --- | --- | --- | --- | --- | --- | --- |
| HP1-13 | --- | --- | --- | --- | --- | --- | --- | --- | --- | --- | --- | --- | --- | --- | --- | --- |
| HP1-14 | --- | --- | --- | --- | --- | --- | --- | --- | --- | --- | --- | --- | --- | --- | --- | --- |
